# Supplementary material for: Uric Acid and Acute Kidney Injury in the Critically Ill
Source: PubMed Central journal article supplement — Kidney Med. 2019 Jan 15;1(1):21–30. doi: 10.1016/j.xkme.2019.01.003 (PMC7380422; doi:10.1016/j.xkme.2019.01.003), 2019-01-15
Supplement: mmc1.pdf [file mmc1.pdf]

**Table S1. Baseline Characteristics of the ICU Cohort by AKI Status**

| <b>Characteristic</b>              | <b>All patients<br/>(n=208)</b> | <b>Incident AKI*<br/>(n=40)</b> | <b>No Incident AKI<br/>(n=168)</b> |
|------------------------------------|---------------------------------|---------------------------------|------------------------------------|
| Plasma uric acid, mg/dl            | 4.7 [3.6 – 6.4]                 | 5.7 [4.1 – 7.8]                 | 4.6 [3.5 – 6.2]                    |
| <b>Demographics</b>                |                                 |                                 |                                    |
| Female, n (%)                      | 94 (45.2)                       | 19 (47.5)                       | 75 (44.6)                          |
| Age, years                         | 61.8 ± 15.3                     | 64.4 ± 13.1                     | 61.2 ± 15.7                        |
| White, n (%)                       | 177 (85.1)                      | 31 (77.5)                       | 146 (86.9)                         |
| <b>Enrollment Characteristics</b>  |                                 |                                 |                                    |
| SCr, mg/dl                         | 0.8 [0.6 – 1.0]                 | 1.0 [0.8 – 1.2]                 | 0.7 [0.6 – 0.9]                    |
| eGFR, ml/min/1.73m <sup>2</sup>    | 91.1 ± 26.6                     | 76.1 ± 28.6                     | 94.7 ± 24.9                        |
| APACHE II                          | 17 [12 – 24]                    | 15 [12 – 23]                    | 17 [13 – 25]                       |
| Sepsis, n (%)                      | 113 (54.3)                      | 23 (57.5)                       | 90 (53.6)                          |
| Etiology, n (%)                    |                                 |                                 |                                    |
| Multifactorial                     | -                               | 18 (45.0)                       | -                                  |
| Ischemic                           | -                               | 9 (22.5)                        | -                                  |
| Pre-renal                          | -                               | 6 (15.0)                        | -                                  |
| Sepsis                             | -                               | 5 (12.5)                        | -                                  |
| Other                              | -                               | 2 (5.0)                         | -                                  |
| <b>Co-morbid Conditions, n (%)</b> |                                 |                                 |                                    |
| Active malignancy                  | 84 (40.4)                       | 12 (30.0)                       | 72 (42.9)                          |
| Chronic lung disease               | 49 (23.6)                       | 17 (42.5)                       | 32 (19.1)                          |
| Diabetes mellitus                  | 44 (21.2)                       | 13 (32.5)                       | 31 (18.5)                          |
| Congestive heart failure           | 12 (5.8)                        | 5 (12.5)                        | 7 (4.2)                            |
| Chronic liver disease              | 10 (4.8)                        | 3 (7.5)                         | 7 (4.2)                            |
| <b>ICU type, n (%)</b>             |                                 |                                 |                                    |
| Medical                            | 112 (53.9)                      | 17 (42.5)                       | 95 (56.5)                          |
| Surgical                           | 96 (46.1)                       | 23 (57.5)                       | 73 (43.5)                          |

Data presented as mean ± standard deviation (SD), or median with interquartile range [IQR] for continuous variables and frequencies for binary variables. Estimated glomerular filtration rate (eGFR) was determined using the Chronic Kidney Disease Epidemiology Collaboration equation.

\*KDIGO stage 1 AKI or greater

**Table S2. Baseline Characteristics of ATN Study Participants by 60-day Mortality**

| Characteristics                     | All participants<br>(n=250) | 60-day mortality<br>(n=125) | No 60-day mortality<br>(n=125) |
|-------------------------------------|-----------------------------|-----------------------------|--------------------------------|
| Plasma uric acid, mg/dl             | 11.1 [8.6 – 14.2]           | 11.1 [8.3 – 14.2]           | 11.1 [9.0 – 13.8]              |
| <b>Demographics</b>                 |                             |                             |                                |
| Female, n (%)                       | 77 (30.8)                   | 39 (31.2)                   | 38 (30.4)                      |
| Age, years                          | 62.0 ± 14.6                 | 64.5 ± 13.1                 | 59.4 ± 15.7                    |
| White, n (%)                        | 199 (79.6)                  | 97 (77.6)                   | 102 (81.6)                     |
| <b>Pre-morbid Characteristics</b>   |                             |                             |                                |
| SCr, mg/dl                          | 1.1 [0.8 – 1.4]             | 1.0 [0.8 – 1.3]             | 1.1 [0.8 – 1.4]                |
| eGFR, ml/min/1.73m <sup>2</sup>     | 69.1 ± 32.8                 | 70.5 ± 31.8                 | 67.7 ± 34.0                    |
| Weight, kg                          | 76.4 ± 15.6                 | 76.4 ± 16.5                 | 76.4 ± 14.7                    |
| <b>Co-morbid Conditions*, n (%)</b> |                             |                             |                                |
| Cardiovascular disease              | 82 (32.8)                   | 45 (36.0)                   | 37 (29.6)                      |
| Diabetes mellitus                   | 72 (28.8)                   | 40 (32.0)                   | 32 (25.6)                      |
| Malignancy                          | 50 (20.0)                   | 24 (19.2)                   | 26 (20.8)                      |
| Immunocompromised                   | 35 (14.0)                   | 14 (11.2)                   | 21 (16.8)                      |
| Cerebrovascular disease             | 29 (11.6)                   | 17 (13.6)                   | 12 (9.6)                       |
| Chronic hypoxemia                   | 25 (10.0)                   | 16 (12.8)                   | 9 (7.2)                        |
| <b>Enrollment Characteristics</b>   |                             |                             |                                |
| BUN prior to RRT, mg/dl             | 69.5 ± 30.1                 | 68.9 ± 31.4                 | 70.1 ± 28.8                    |
| SCr prior to RRT, mg/dl             | 4.1 [3.0 – 5.6]             | 3.6 [2.8 – 5.0]             | 4.7 [3.6 – 6.0]                |
| Mean Arterial Pressure, mmHg        | 76.0 ± 15.4                 | 73.6 ± 15.6                 | 78.5 ± 14.8                    |
| Urine volume, ml/24 hrs             | 195 [72 – 545]              | 124 [52 – 410]              | 280 [127 – 825]                |
| Urine volume, ml/hr                 | 10.9 [4.2 – 26.0]           | 6.1 [2.3 – 18.2]            | 15.3 [6.4 – 40.9]              |
| Oliguria, n (%)                     | 189 (75.6)                  | 102 (81.6)                  | 87 (69.6)                      |
| Mechanical Ventilation, n (%)       | 189 (75.6)                  | 106 (84.8)                  | 83 (66.4)                      |
| APACHE II                           | 26 [21 – 31]                | 28 [24 – 33]                | 23 [20 – 29]                   |
| <b>SOFA Cardiovascular, n (%)</b>   |                             |                             |                                |
| 0-2                                 | 102 (40.8)                  | 38 (30.4)                   | 64 (51.2)                      |
| 3-4                                 | 148 (59.2)                  | 87 (69.6)                   | 61 (48.8)                      |
| <b>Treatment, n (%)</b>             |                             |                             |                                |
| Intensive                           | 122 (48.8)                  | 61 (48.8)                   | 61 (48.8)                      |
| Less-intensive                      | 128 (51.2)                  | 64 (51.2)                   | 64 (51.2)                      |
| <b>ICU type, n (%)</b>              |                             |                             |                                |
| Medical                             | 122 (48.8)                  | 59 (47.2)                   | 63 (50.4)                      |
| Surgical                            | 108 (43.2)                  | 53 (42.4)                   | 55 (44.0)                      |
| Other                               | 20 (8.0)                    | 13 (10.4)                   | 7 (5.6)                        |
| Post-surgical, n (%)                | 126 (50.4)                  | 63 (50.4)                   | 63 (50.4)                      |
| <b>Etiology of AKI, n (%)</b>       |                             |                             |                                |
| Ischemic                            | 198 (79.2)                  | 94 (75.2)                   | 104 (83.2)                     |
| Nephrotoxic                         | 48 (19.2)                   | 17 (13.6)                   | 31 (24.8)                      |
| Sepsis                              | 132 (52.8)                  | 70 (56.0)                   | 62 (49.6)                      |
| Multifactorial                      | 135 (54.0)                  | 68 (54.4)                   | 67 (53.6)                      |

Data presented as mean ± SD, or median [IQR] for continuous variables and frequencies for binary or categorical variables. eGFR was determined using the Modification of diet in renal disease (MDRD) equation.

\*Cardiovascular disease includes participants with a history of myocardial infarction, angina, or congestive heart failure. Diabetes mellitus includes participants with a history of end organ disease from diabetes, use of diabetic diet, or on diabetic medications. Malignancy includes participants with a history of leukemia and tumors with or without metastasis. Immunocompromised includes participants with a history of human

immunodeficiency virus, acquired immune deficiency syndrome, or on immunosuppressive therapy. Cerebrovascular disease includes participants with a history of transient ischemic attack or stroke.

**Table S3. Baseline Characteristics in the ATN Study: Participants not in Subcohort vs Subcohort included in this study**

| Characteristics                   | ATN Study<br>Not in Subcohort<br>(n=874) | ATN Study<br>Subcohort<br>(n=250) | P      |
|-----------------------------------|------------------------------------------|-----------------------------------|--------|
| <b>Demographics</b>               |                                          |                                   |        |
| Female, %                         | 254 (29.1)                               | 77 (30.8)                         | 0.6    |
| Age, years                        | 59.0 ± 15.4                              | 62.0 ± 14.6                       | 0.006  |
| White, %                          | 635 (72.7)                               | 199 (79.6)                        | 0.03   |
| <b>Pre-morbid Characteristics</b> |                                          |                                   |        |
| SCr, mg/dl                        | 1.1 [0.9 – 1.4]                          | 1.1 [0.8 – 1.4]                   | 0.9    |
| eGFR, ml/min/1.73m <sup>2</sup>   | 72.1 ± 41.5                              | 69.1 ± 32.8                       | 0.3    |
| <b>Co-morbid Conditions, %</b>    |                                          |                                   |        |
| Cardiovascular disease            | 327 (37.4)                               | 82 (32.8)                         | 0.2    |
| Diabetes mellitus                 | 251 (28.7)                               | 72 (28.8)                         | 0.9    |
| Malignancy                        | 174 (19.9)                               | 50 (20.0)                         | 0.8    |
| Immunocompromised                 | 143 (16.4)                               | 35 (14.0)                         | 0.4    |
| Cerebrovascular disease           | 93 (10.6)                                | 29 (11.6)                         | 0.6    |
| Chronic hypoxemia                 | 82 (9.4)                                 | 25 (10.0)                         | 0.6    |
| <b>Enrollment Characteristics</b> |                                          |                                   |        |
| BUN prior to RRT, mg/dl           | 58.0 ± 30.0                              | 69.5 ± 30.1                       | <0.001 |
| SCr prior to RRT, mg/dl           | 3.4 [2.5 – 4.6]                          | 4.1 [3.0 – 5.6]                   | <0.001 |
| Urine volume, ml/24 hrs           | 180 [50 – 405]                           | 195 [72 – 545]                    | 0.01   |
| Oliguria, %                       | 686 (78.4)                               | 189 (75.6)                        | 0.3    |
| Mechanical Ventilation, %         | 715 (81.8)                               | 189 (75.6)                        | 0.02   |
| APACHE II                         | 26 [21 – 32]                             | 26 [21 – 31]                      | 0.8    |
| SOFA Cardiovascular, %            |                                          |                                   | 0.1    |
| 0-2                               | 407 (46.6)                               | 102 (40.8)                        |        |
| 3-4                               | 467 (53.6)                               | 148 (59.2)                        |        |
| Treatment, %                      |                                          |                                   | 0.6    |
| Intensive                         | 441 (50.5)                               | 122 (48.8)                        |        |
| Less-intensive                    | 433 (49.5)                               | 128 (51.2)                        |        |
| <b>60-day mortality, %</b>        | 466 (53.3)                               | 125 (50.0)                        | 0.4    |

**Table S4. Unadjusted Predictors of Uric Acid in the ATN Study Cohort**

| <b>Variable</b>                          | <b>Δ Uric Acid, mg/dl</b> | <b>95% CI</b> | <b>P</b> |
|------------------------------------------|---------------------------|---------------|----------|
| Age, per year                            | -0.05                     | -0.09, -0.007 | 0.02     |
| Female                                   | -0.54                     | -1.81, 0.73   | 0.4      |
| eGFR (pre-morbid) per 1 ml/min           | -0.005                    | -0.02, 0.01   | 0.6      |
| SCr (pre-morbid) per 1 mg/dl             | 0.84                      | -0.88, 2.55   | 0.3      |
| SCr (enrollment) per 1 mg/dl             | 0.65                      | 0.35, 0.96    | <0.001   |
| Δ SCr per 1 mg/dl                        | 0.60                      | 0.26, 0.94    | <0.001   |
| Admit BUN per 1 mg/dl                    | 0.05                      | 0.03, 0.07    | <0.001   |
| Recent BUN per 1 mg/dl                   | 0.04                      | 0.02, 0.05    | <0.001   |
| Δ BUN per 1 mg/dl                        | -0.001                    | -0.02, 0.02   | 0.9      |
| Race: Non-white vs White                 | 0.12                      | -1.34, 1.57   | 0.9      |
| Diabetes mellitus                        | 0.69                      | -0.63, 2.02   | 0.3      |
| Natural log urine volume (mL)/24hr       | 0.004                     | -0.33, 0.34   | 0.9      |
| Randomization arm (high vs less intense) | -0.13                     | -1.30, 1.05   | 0.8      |
| APACHE II, per 1 point                   | 0.02                      | -0.07, 0.10   | 0.7      |
| SOFA (3-4 vs 0-2)                        | -0.25                     | -1.45, 0.95   | 0.7      |
| Mechanical ventilation                   | -0.07                     | -1.44, 1.30   | 0.9      |
